# Supplementary material for: Exploring aerosol–cloud interaction using VOCALS-REx aircraft measurements
Source: Copernicus journal article supplement (doi:10.5194/acp-19-7955-2019), 2019-06-18

Supplement of Atmos. Chem. Phys., 19, 7955–7971, 2019  
<https://doi.org/10.5194/acp-19-7955-2019-supplement>  
© Author(s) 2019. This work is distributed under  
the Creative Commons Attribution 4.0 License.

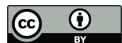

*Supplement of*

## **Exploring aerosol–cloud interaction using VOCALS-REx aircraft measurements**

**Hailing Jia et al.**

*Correspondence to:* Xiaoyan Ma ([xma@nuist.edu.cn](mailto:xma@nuist.edu.cn))

The copyright of individual parts of the supplement might differ from the CC BY 4.0 License.

### Figure List

Figure S1. Normalized profiles of  $N_d$ . Values of  $Z_N=0$  indicates the cloud base whereas  $Z_N=1$  the cloud top. Orange line indicates the average profiles.

Figure S2. (a)  $P_{LWC}$  and (b)  $P_{N_d}$  as a function of  $AF_{ent}/AF_{non-ent}$  for all 16 non-drizzling flights.

**Figure S1**

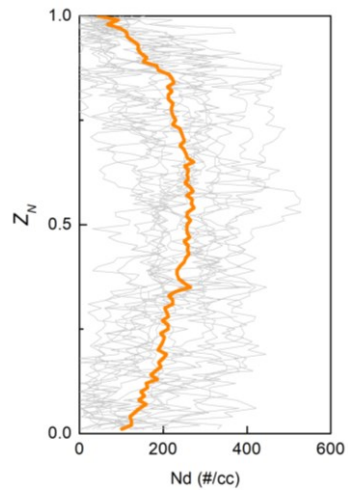

**Figure S2**

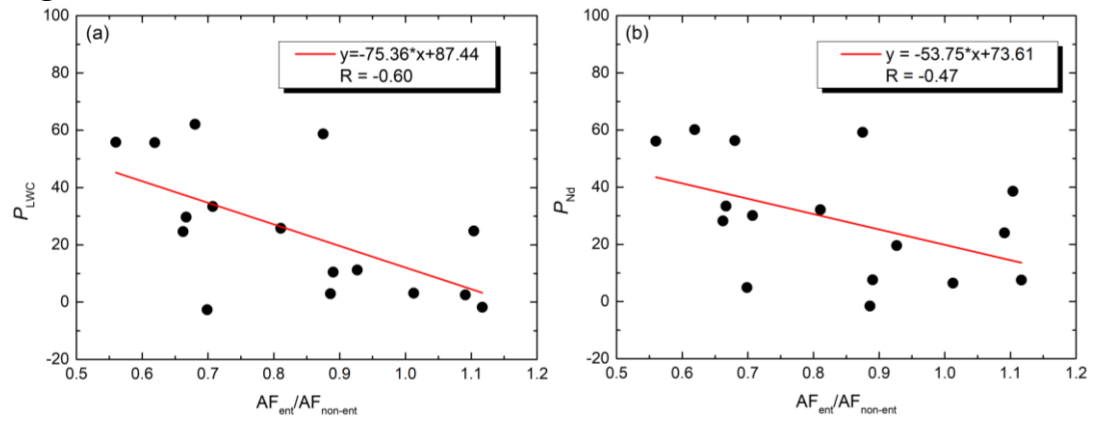

Supplement: Supplementary file 1 [file acp-19-7955-2019-supplement.pdf]
